# Supplementary material for: Common alleles of CMT2 and NRPE1 are major determinants of CHH methylation variation in Arabidopsis thaliana
Source: PLOS journal article supplement (doi:10.1371/journal.pgen.1008492), 2019-12-30
Supplement: S15 (10.1371/journal.pgen.1008492.s015) [file journal.pgen.1008492.s015]

**S4 Table. Compositions of TE superfamilies in Col-0 reference and it of common in the population ( $n=774$ )**

|               | Reference<br>(All TEs in Col-0) | Common |
|---------------|---------------------------------|--------|
| RC/Helitron   | 41.66%                          | 48.90% |
| DNA/MuDR      | 17.41%                          | 16.01% |
| LTR/Gypsy     | 13.45%                          | 14.79% |
| DNA           | 5.89%                           | 2.84%  |
| LTR/Copia     | 5.73%                           | 5.02%  |
| LINE/L1       | 4.40%                           | 3.21%  |
| DNA/HAT       | 3.33%                           | 2.66%  |
| DNA/En-Spm    | 3.03%                           | 3.31%  |
| DNA/Harbinger | 1.22%                           | 1.07%  |
| DNA/Pogo      | 1.11%                           | 0.78%  |
| RathE1_cons   | 0.69%                           | 0.23%  |
| DNA/Mariner   | 0.49%                           | 0.12%  |
| SINE          | 0.42%                           | 0.29%  |
| RathE3_cons   | 0.33%                           | 0.18%  |
| DNA/Tc1       | 0.31%                           | 0.12%  |
| LINE          | 0.26%                           | 0.28%  |
| RathE2_cons   | 0.24%                           | 0.14%  |
| null          | 0.05%                           | 0.05%  |
